# Supplementary material
Source: PubMed Central journal article supplement (PMC2238677)

# Figure S1

## A

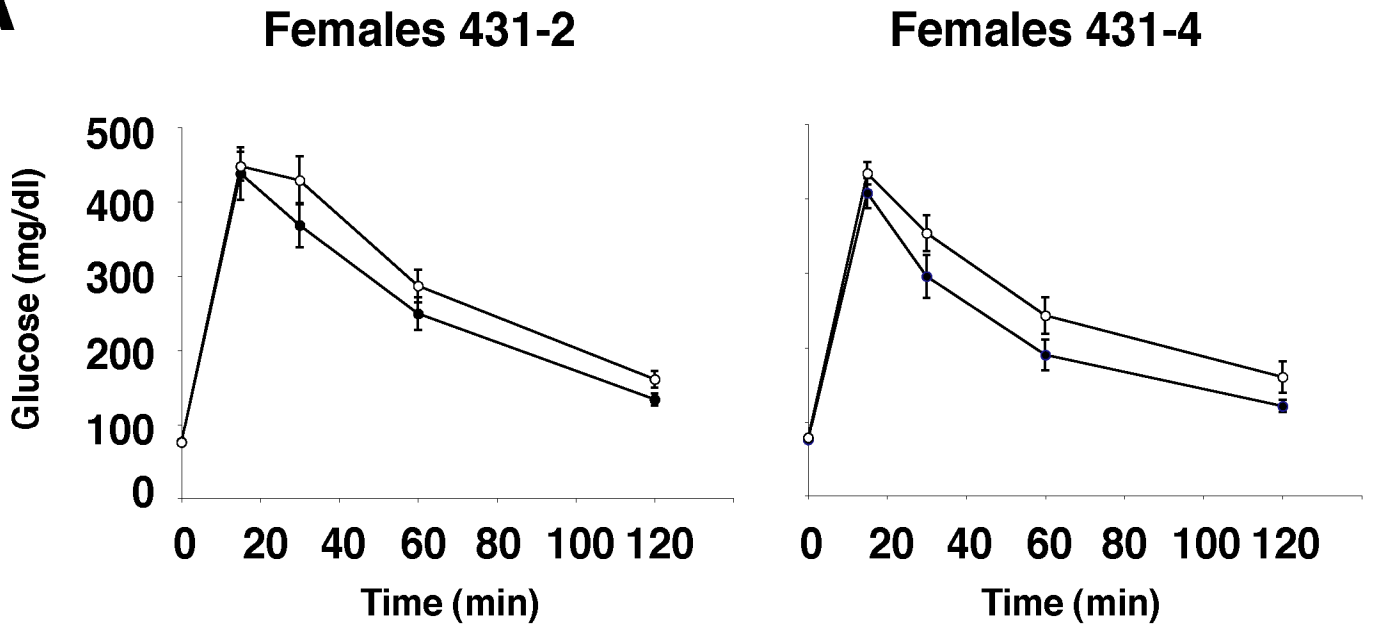

## B

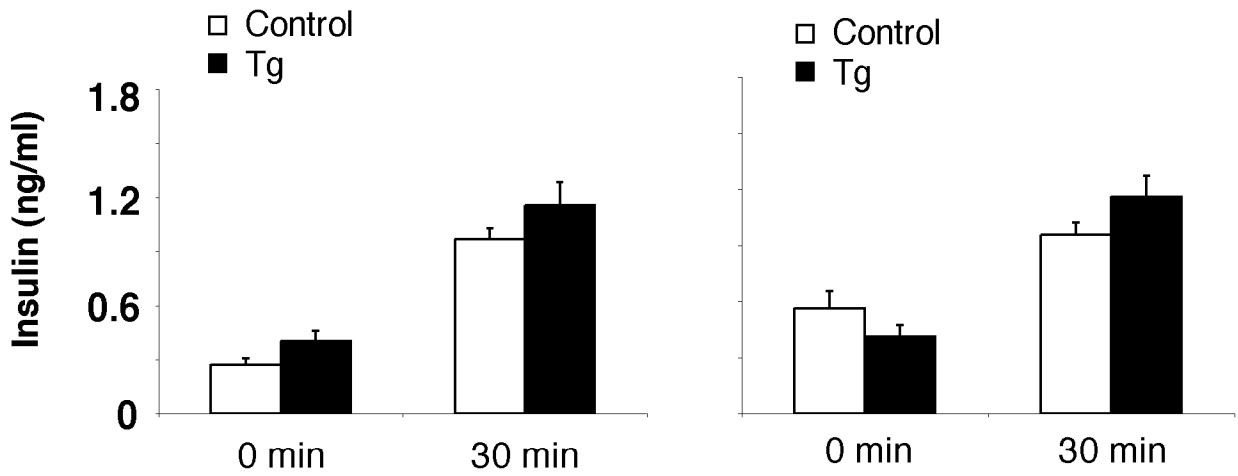

# Figure S2

## A

### Males

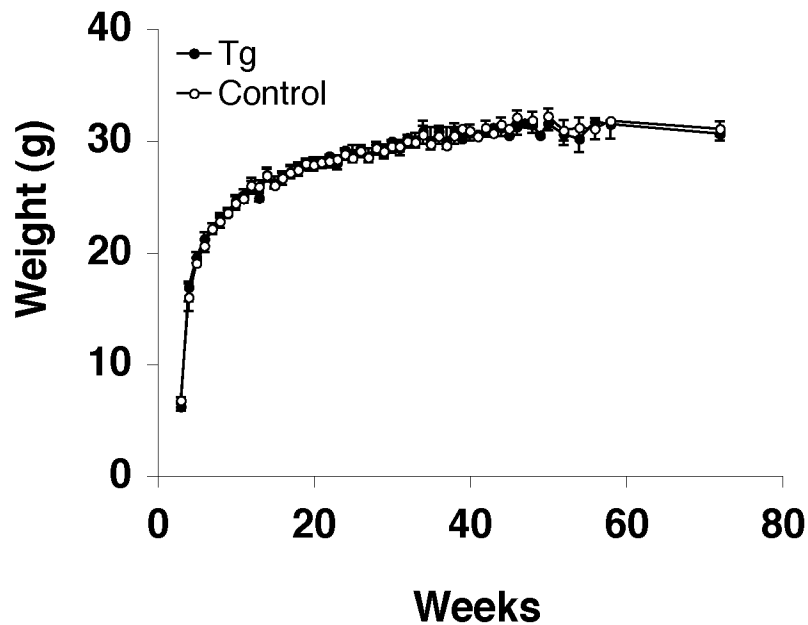

### Females

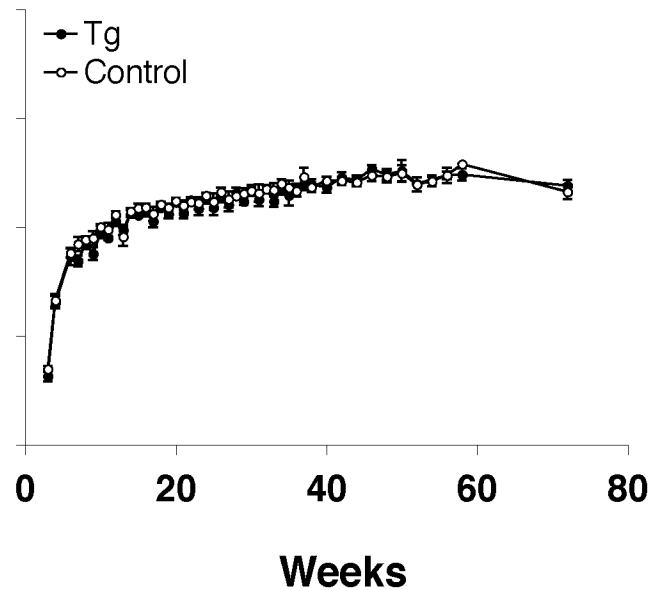

## B

### Males

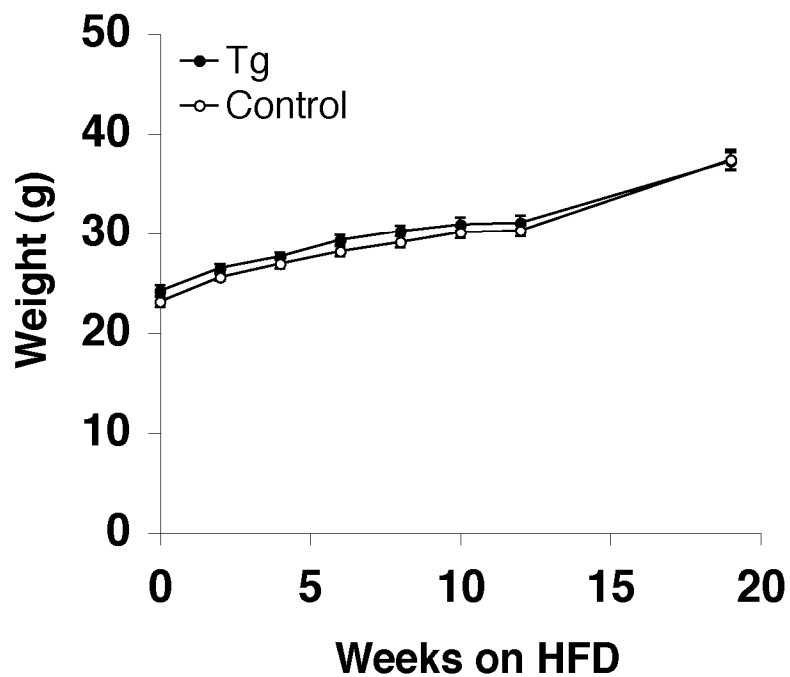

### Females

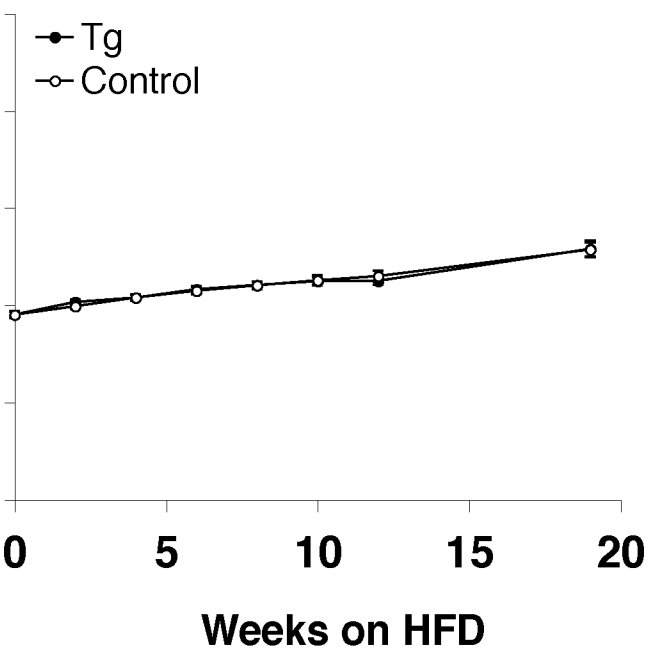

# Figure S3

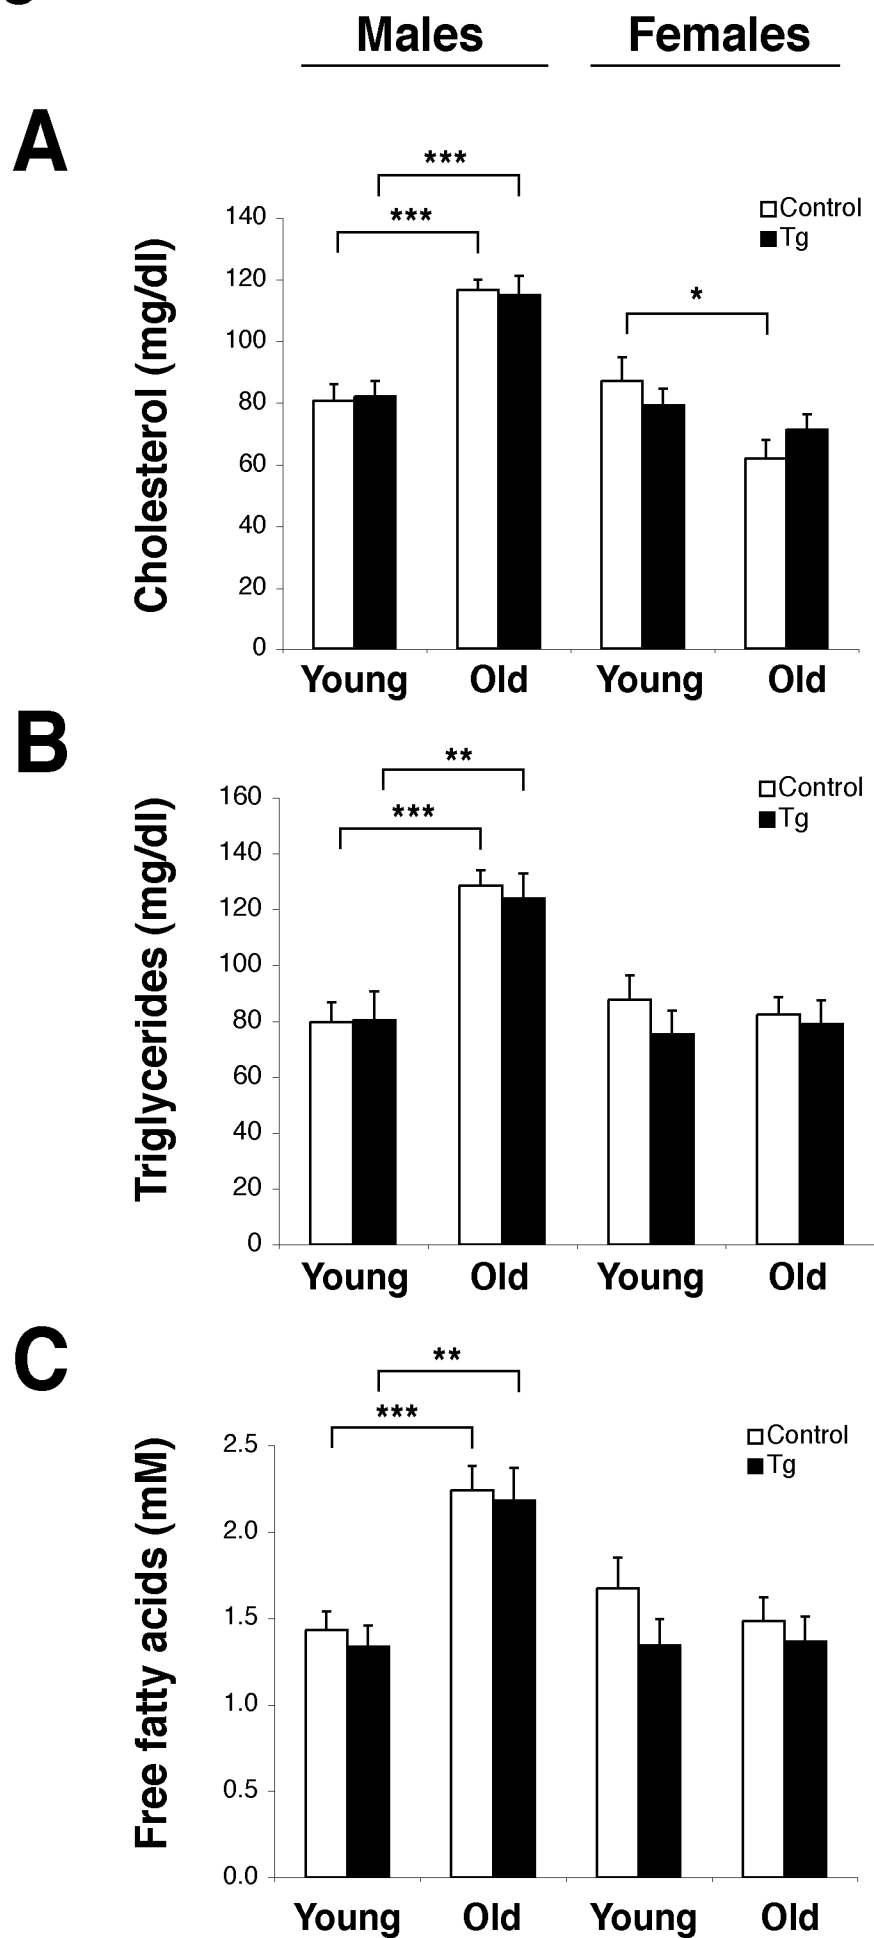

# Figure S4

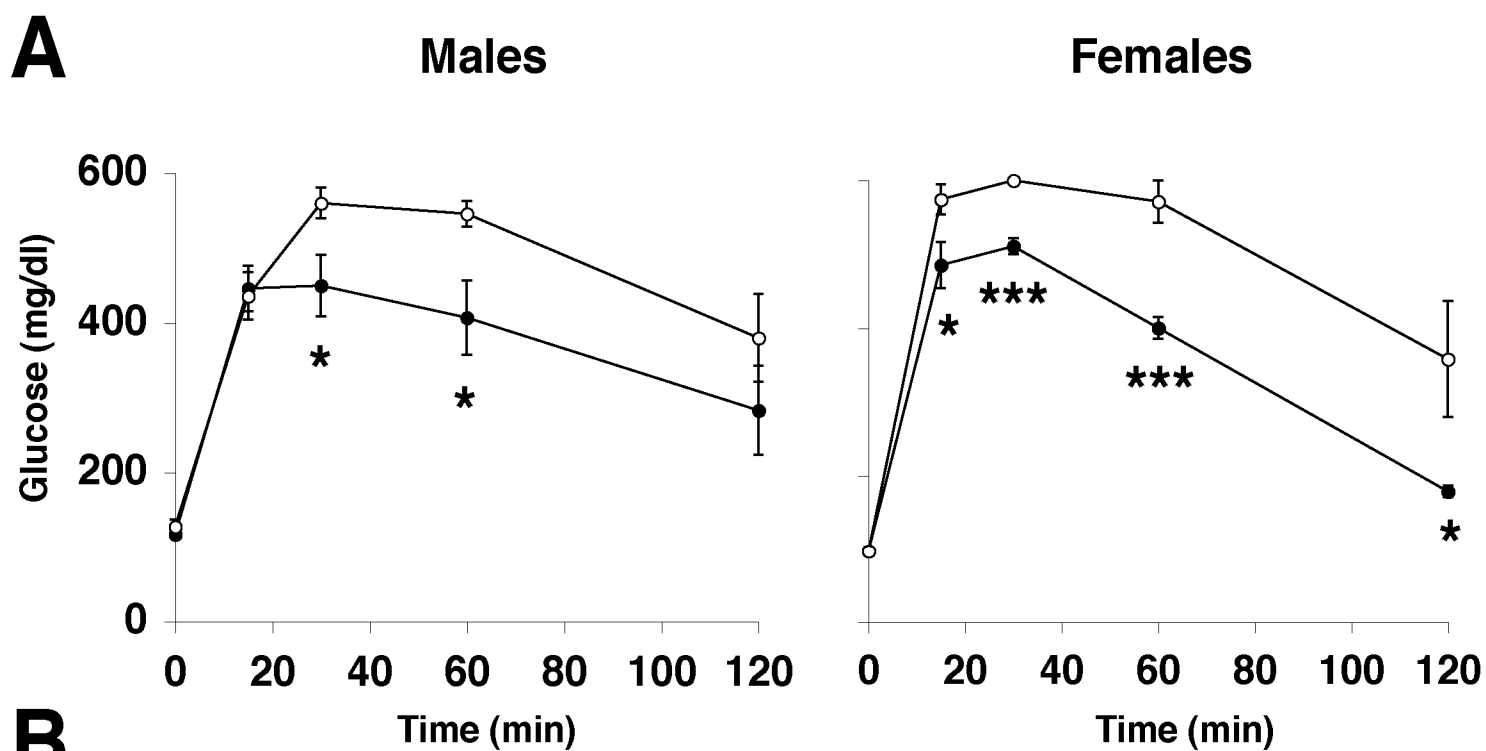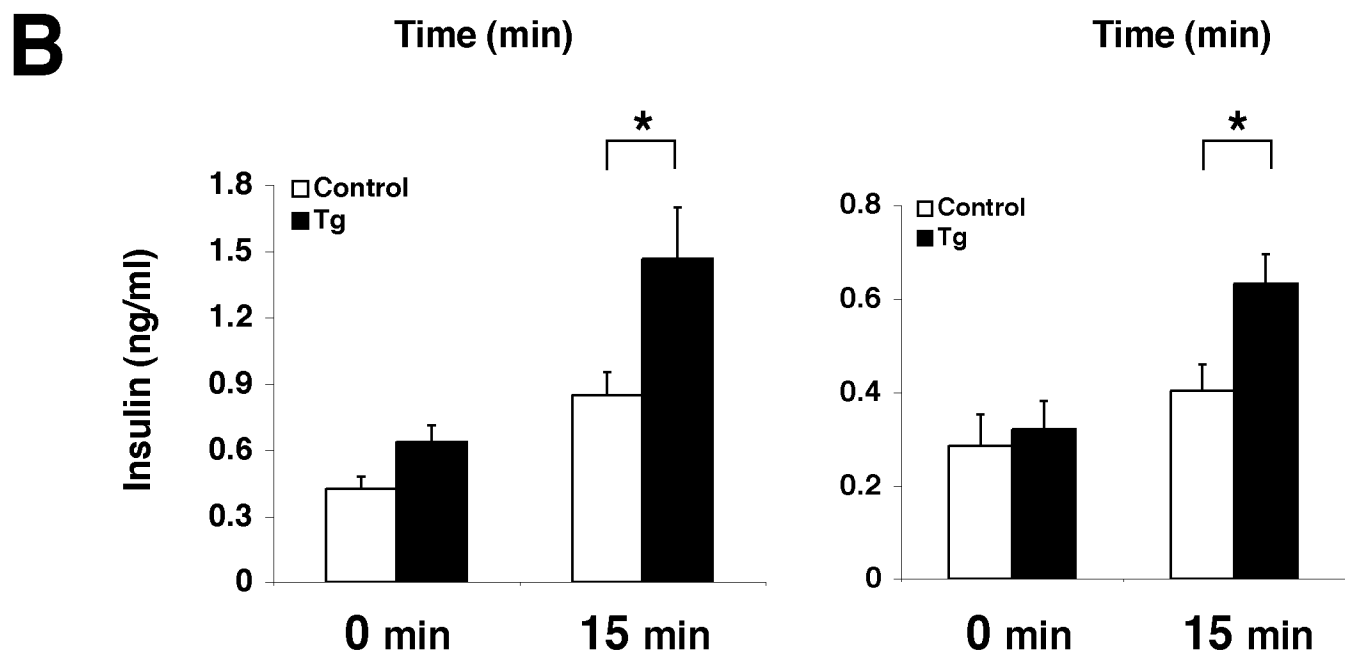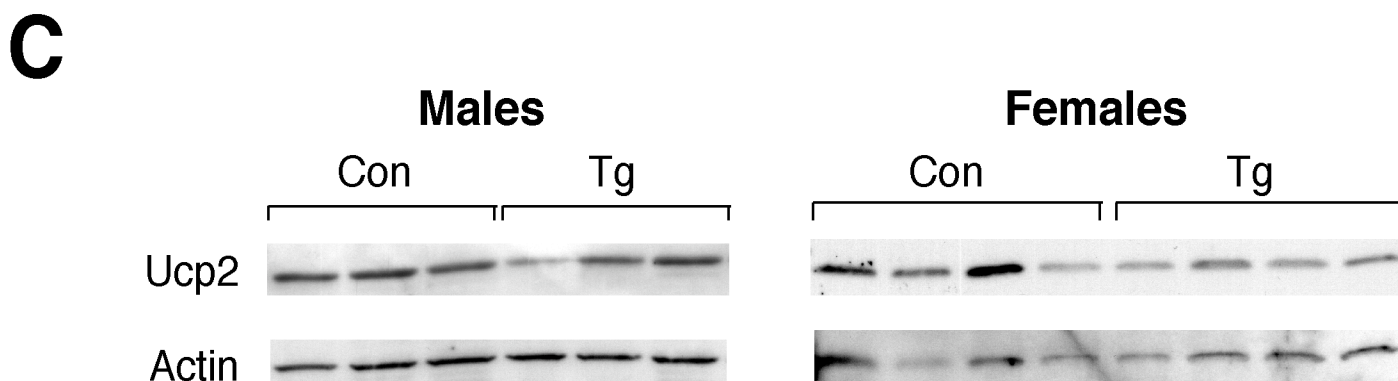

# Figure S5

## A

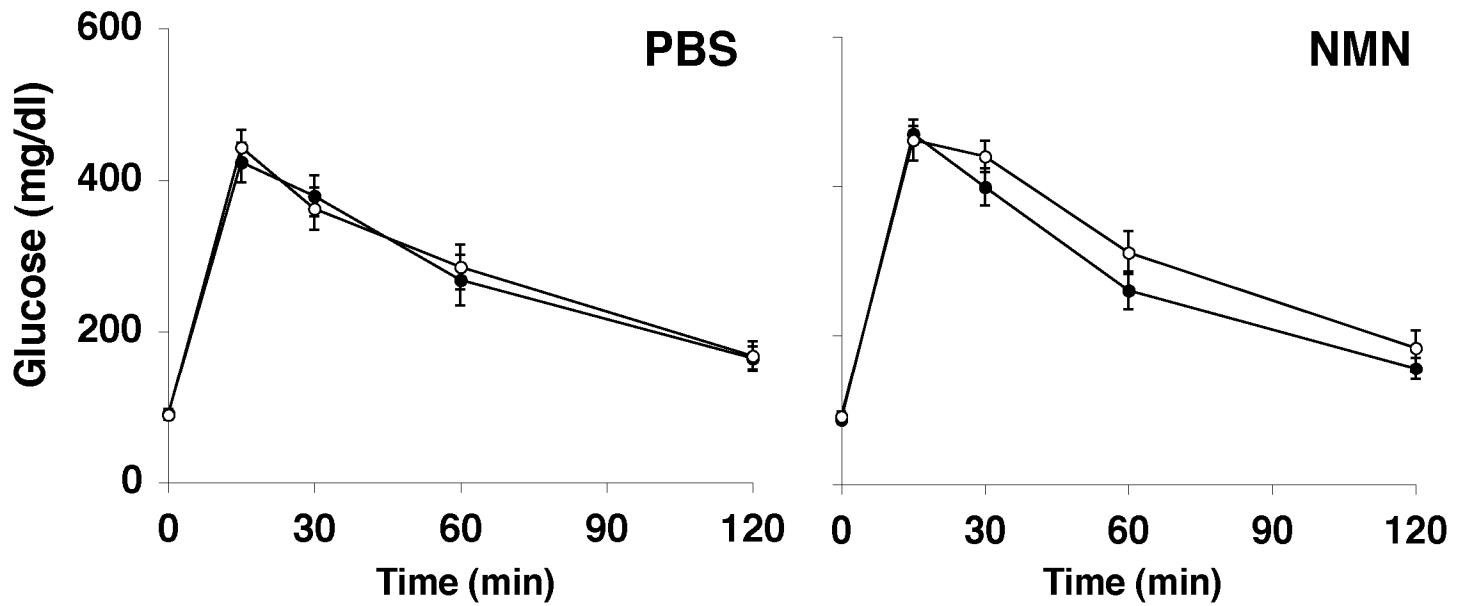

## B

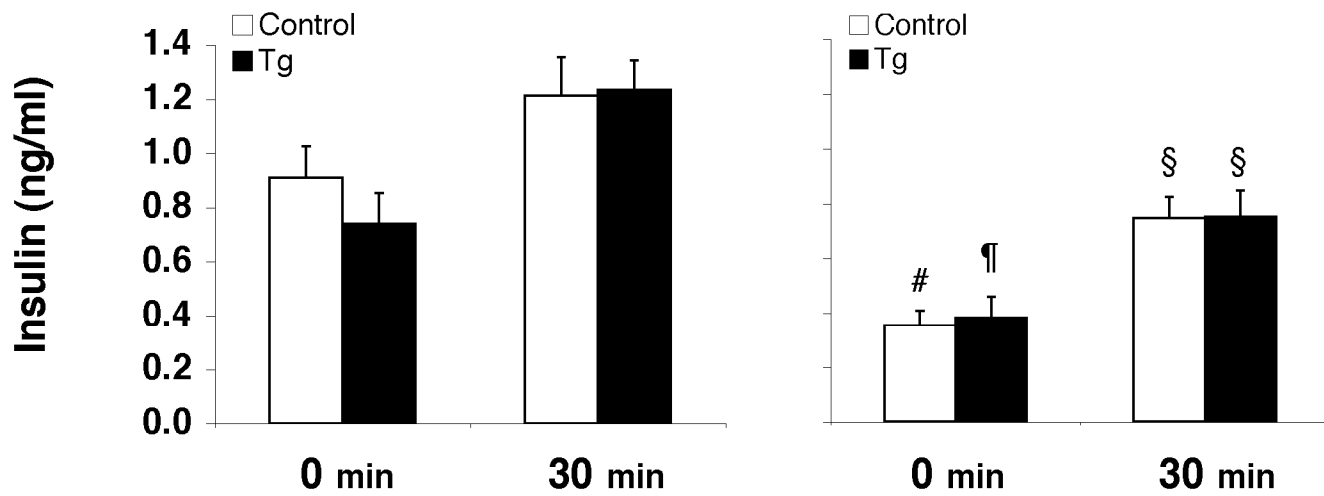

Supplement: NIHMS38428-supplement-supp_figures.pdf [file NIHMS38428-supplement-supp_figures.pdf]
